# Supplementary material for: Increased Incidence of Invasive Haemophilus influenzae Disease Driven by Non-Type B Isolates in Ontario, Canada, 2014 to 2018
Source: PubMed Central journal article supplement (PMC8510165; doi:10.1128/spectrum.00803-21), 2021-10-06
Supplement: spectrum00803-21_supp_1_seq9.pdf [file spectrum00803-21_supp_1_seq9.pdf]

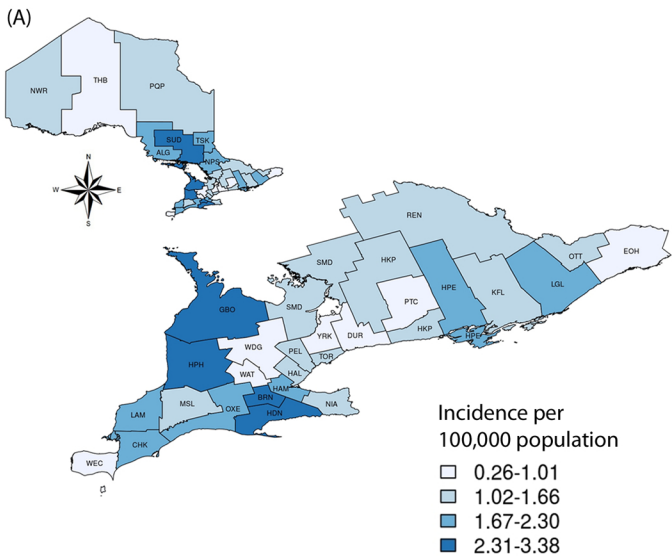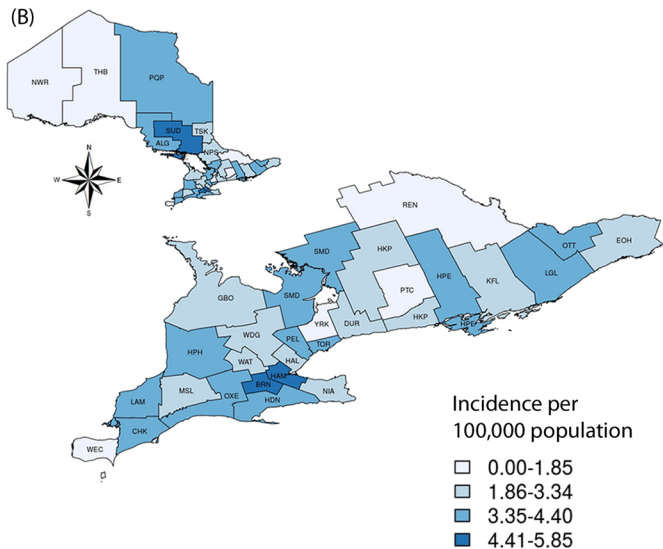

Figure S1: Geographical distribution of incidence of Hi reported in 34 PHUs in Ontario for (A) all cases of Hi (B) cases of NTHi in individuals 65 years of age and older

Code Name

|     |                                             |
|-----|---------------------------------------------|
| ALG | Algoma District                             |
| BRN | Brant County                                |
| CHK | Chatham-Kent                                |
| DUR | Durham Regional                             |
| EOH | Eastern Ontario                             |
| GBO | Grey Bruce                                  |
| HAL | Halton Regional                             |
| HAM | City of Hamilton                            |
| HDN | Haldimand-Norfolk                           |
| HKP | Haliburton-Kawartha-Pine Ridge District     |
| HPE | Hastings and Prince Edward Counties         |
| HPH | Huron Perth                                 |
| KFL | Kingston-Frontenac and Lennox and Addington |
| LAM | Lambton                                     |
| LGL | Leeds-Grenville and Lanark District         |
| MSL | Middlesex-London                            |
| NIA | Niagara Regional Area                       |

Health Unit

|     |                                |
|-----|--------------------------------|
| NPS | North Bay Parry Sound District |
| NWR | Northwestern                   |
| OTT | City of Ottawa                 |
| OXE | Oxford Elgin St.Thomas         |
| PEL | Peel Regional                  |
| POP | Porcupine                      |
| PTC | Peterborough County-City       |
| REN | Renfrew County and District    |
| SMD | Simcoe Muskoka District        |
| SUD | Sudbury and District           |
| THB | Thunder Bay District           |
| TOR | City of Toronto                |
| TSK | Timiskaming                    |
| WAT | Waterloo                       |
| WDG | Wellington-Dufferin-Guelph     |
| WEC | Windsor-Essex County           |
| YRK | York Regional                  |
